# INFOGRAPHICS IN ANESTHESIOLOGY

Complex Information for Anesthesiologists Presented Quickly and Clearly

## Ring Around the Rocuronium

### Sugammadex Encapsulation Explained BIT by BIT

#### Who

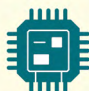

Drug development can be improved with *in silico* methods, *i.e.*, using computer modeling.<sup>1</sup> In this issue of *ANESTHESIOLOGY*, Irani *et al.* use molecular simulation to study sugammadex pharmacology.<sup>2</sup>

#### Why

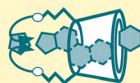

The final sugammadex-rocuronium structure is known, but not how the binding process dynamically occurs. Irani *et al.* hypothesized that rocuronium enters the sugammadex molecule's primary face *via* a positive-negative charge attraction.

#### What

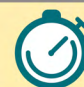

The simulated center-of-mass distance was used to quantify the association between rocuronium and sugammadex. The strength of association was estimated using relative binding free energy over the last 3 ns of 5 ns simulations.

#### Validation

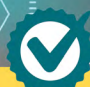

Simulation-derived relative binding free energies between various drugs and sugammadex were compared to published, *in vitro*-derived association constants. A bilogarithmic correlation was found, validating this methodology.

#### How

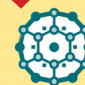

Molecular dynamics modeling was used to visualize the dynamic encapsulation process, which required quantum mechanical characterization of the molecular structures and movement based on intermolecular forces.

#### Results

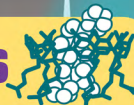

Rocuronium has an initial stage of weak binding with the secondary face of sugammadex *via* intermolecular hydrogen bonds, which is opposite to the side hypothesized. It subsequently establishes energetically stable encapsulation.

ns, nanosecond.

Infographic created by Holly B. Ende, Vanderbilt University Medical Center; James P. Rathmell, Brigham and Women's Health Care/Harvard Medical School; and Jonathan P. Wanderer, Vanderbilt University Medical Center. Illustration by Annemarie Johnson, Vivo Visuals Studio. Address correspondence to Dr. Ende: holly.ende@vumc.org.

1. Bertaccini EJ: Anesthesia, coming of age in the world of modern *in silico* drug design. *ANESTHESIOLOGY* 2023; 138:129–31

2. Irani AH, Voss L, Whittle N, Sleigh JW: Encapsulation dynamics of neuromuscular blocking drugs by sugammadex. *ANESTHESIOLOGY* 2023; 138:152–63
